# Supplementary material
Source: HighWire-hosted journal article supplement (https://qdcxjkg.com/highwire/filestream/113701/field_highwire_adjunct_files/1/ERJ-01629-2012_Disclosures.pdf)
Supplement: ERJ-01629-2012_Disclosures.pdf [file ERJ-01629-2012_Disclosures.pdf]

**C.E. Brightling:** has received consultancy fees and research funding from GSK, Novartis, Roche, Chiesi, MedImmune, and AstraZeneca.

**I.D. Pavord:** has received consultancy fees and research funding from GSK, AstraZeneca and Norvartis.

**A.J. Wardlaw:** has received consultancy fees and research funding from GSK, AstraZeneca, Pfizer and Aerovance.
